# Supplementary material for: Materials design of vertically coupled plasmonic arrays
Source: Royal Society of Chemistry journal article supplement (doi:10.1039/d1na00647a), 2021-01-01
Supplement: d1na00647a1.pdf [file d1na00647a1.pdf]

# Supplemental Information

## Materials design of vertically coupled plasmonic arrays

Goekalp Engin Akinoglu<sup>1,2,\*</sup>, Eser Metin Akinoglu<sup>3</sup>, Krzysztof Kempa<sup>4</sup>, James Andell Hutchison<sup>1,\*</sup>

<sup>1</sup>*School of Chemistry, University of Melbourne, Parkville, Victoria, 3010, Australia*

<sup>2</sup>*Advanced Materials & BioEngineering Research Centre (AMBER), The School of Chemistry, Trinity College Dublin, The University of Dublin, Dublin 2, Ireland*

<sup>3</sup>*International Academy of Optoelectronics at Zhaoqing, South China Normal University, Zhaoqing, 526238 Guangdong, China*

<sup>4</sup>*Boston College, Department of Physics, Chestnut Hill, MA 02467, USA*

E-mail: engina@zedat.fu-berlin.de, james.hutchison@unimelb.edu.au

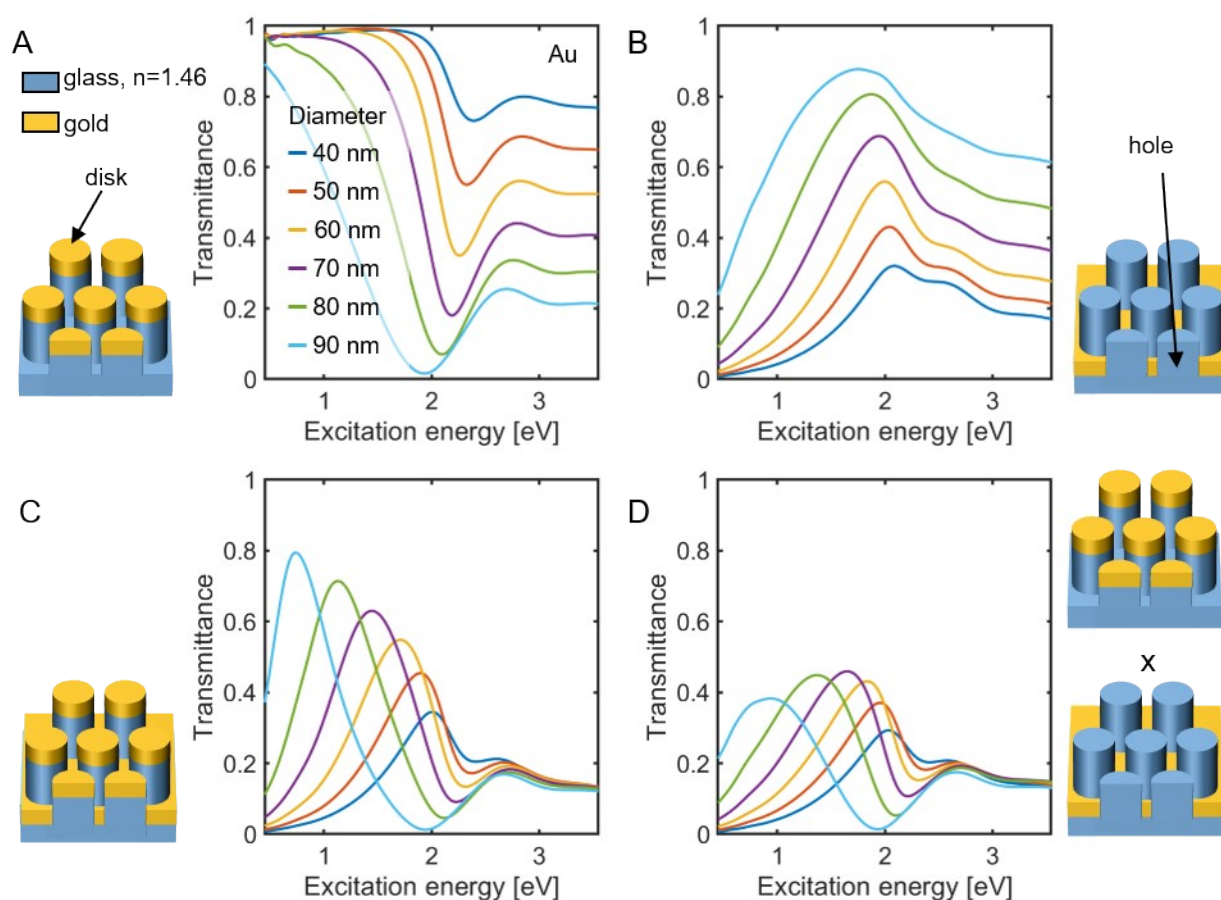

Figure S1. Respective figures in Fig. 1 of the manuscript in eV instead of wavelength.

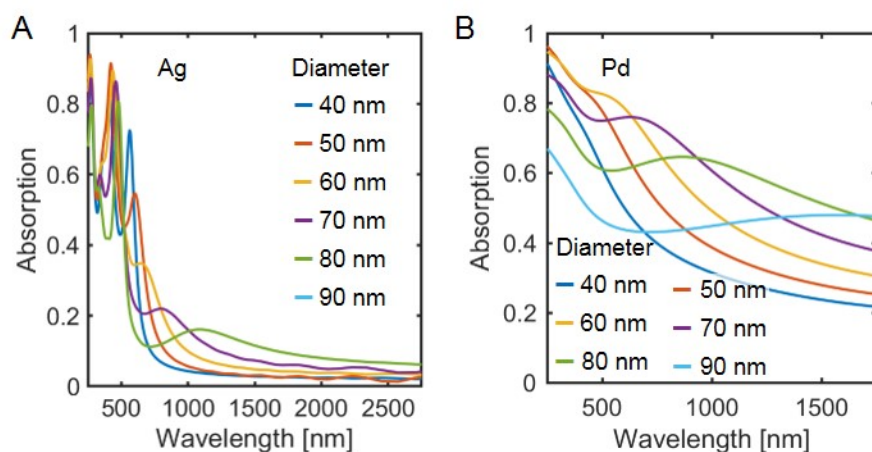

Figure S2. FDTD absorption spectra of VCPAs made with different metal films (all 40 nm thick), with varying pillar diameter, fixed pillar height = 45 nm and fixed array pitch = 100 nm. (A) Ag and (B) Pd.
